# Supplementary material
Source: PubMed Central journal article supplement (PMC5710333)
Supplement: jamaneurol-74-983-s001.pdf [file jamaneurol-74-983-s001.pdf]

## Supplementary Online Content

Razaz N, Tomson T, Wikström A-K, Cnattingius S. Association between pregnancy and perinatal outcomes among women with epilepsy. *JAMA Neurol.* Published online July 3, 2017. doi:10.1001/jamaneurol.2017.1310

**eTable 1.** ICD-10 Codes for Maternal and Neonatal Diseases

**eTable 2.** ICD-10 Codes For Major Congenital Malformations According to the European Surveillance of Congenital Anomalies Classification

**eTable 3.** Clinical Characteristics of in Women With Epilepsy

This supplementary material has been provided by the authors to give readers additional information about their work.

**eTable 1. ICD-10 Codes for Maternal and Neonatal Diseases**

| <b>Diseases</b>                                        | <b>ICD-9/10 codes</b>                                                                                                                                                                                                                                                                                                          |
|--------------------------------------------------------|--------------------------------------------------------------------------------------------------------------------------------------------------------------------------------------------------------------------------------------------------------------------------------------------------------------------------------|
| <b>Epilepsy*</b>                                       | ICD-9: 354; ICD-10: G40                                                                                                                                                                                                                                                                                                        |
| <b>Maternal complications**</b>                        |                                                                                                                                                                                                                                                                                                                                |
| Placental abruption                                    | ICD-10: O45                                                                                                                                                                                                                                                                                                                    |
| Postpartum hemorrhage                                  | ICD-10: O72                                                                                                                                                                                                                                                                                                                    |
| Premature rupture of membranes                         | ICD-10: O42                                                                                                                                                                                                                                                                                                                    |
| Prolonged labour                                       | ICD-10: O63.0, O63.1                                                                                                                                                                                                                                                                                                           |
| Psychiatric disorders                                  | ICD-9: 290–319; ICD-10: F00–F99                                                                                                                                                                                                                                                                                                |
| Substance or alcohol abuse                             | ICD-9: 303, 304, 305.1, 305.9; ICD-10: F10–F19                                                                                                                                                                                                                                                                                 |
| Pre-gestational hypertension <sup>†</sup>              | ICD-10: I10 to I15, O10 and O11                                                                                                                                                                                                                                                                                                |
| Preeclampsia and eclampsia                             | ICD-10: O14 and O15                                                                                                                                                                                                                                                                                                            |
| Pregestational diabetes                                | ICD-10: E10 to E14, O24.0 to O24.3                                                                                                                                                                                                                                                                                             |
| Gestational diabetes                                   | ICD-10: O24.4                                                                                                                                                                                                                                                                                                                  |
| Maternal infection                                     | ICD-10: A00-B99, G00-G07; I00-I02; I32.0; I33, I38; I40.0; J00-J06; J10-J18; J20-J22; J36; J39.0; J85.1; J86; K35-K37; K57.0; K57.2; K57.4; K57.8; K61; K63.0; K65.0; K65.9; K67; K75.0; K75.1; K80.0; K80.3; K80.4; K81.0; K81.9; K83.0; L00-L03; L05-L08; M00; M01; M86; N10; N12; N15.1; N30; N39.0; N41; N45; N70-N77; O23 |
| Chorioamnionitis                                       | ICD-10: O411, O4110, O411A, O411B, O411C, O411X                                                                                                                                                                                                                                                                                |
| <b>Neonatal complications<sup>‡</sup></b>              |                                                                                                                                                                                                                                                                                                                                |
| Neonatal infections <sup>¶</sup>                       | ICD-10: P77.9, P35 to P39                                                                                                                                                                                                                                                                                                      |
| Asphyxia-related neonatal complications                |                                                                                                                                                                                                                                                                                                                                |
| Meconium aspiration                                    | ICD-10: P24.0                                                                                                                                                                                                                                                                                                                  |
| Hypoxic ischemic encephalopathy and related conditions | ICD-10: P91.0, P91.3 to P91.6, P91.8 to P91.9                                                                                                                                                                                                                                                                                  |
| Convulsions/seizures                                   | ICD-10: P90                                                                                                                                                                                                                                                                                                                    |
| Hypoglycemia                                           | ICD-10: P70                                                                                                                                                                                                                                                                                                                    |
| Jaundice                                               | ICD-10: P55-P59                                                                                                                                                                                                                                                                                                                |
| Respiratory distress                                   | ICD-10: P20, P22, P24-P28                                                                                                                                                                                                                                                                                                      |

|                                 |                                                                                                                                                                                                                                                                                               |
|---------------------------------|-----------------------------------------------------------------------------------------------------------------------------------------------------------------------------------------------------------------------------------------------------------------------------------------------|
| <b>Congenital malformations</b> |                                                                                                                                                                                                                                                                                               |
| Any malformation                | ICD-10: Q00 to Q99, excluding minor malformations as defined by the Swedish National Board of Health and Welfare <sup>1</sup> : Q17.0, Q17.5, Q18.0, Q18.1, Q25.0, Q27.0, Q31.5, Q32.0, Q52.3, Q53.0 to Q53.9, Q66.5 to Q66.9, Q69.0 to Q69.9, Q70.0 to Q70.9, Q76.0, Q79.9, Q82.5, and Q82.9 |
|                                 |                                                                                                                                                                                                                                                                                               |
|                                 |                                                                                                                                                                                                                                                                                               |

Diseases were defined using the Swedish version of the International classification of Diseases, ninth and tenth revision (ICD-9; ICD-10).

\*A case of epilepsy was identified if it met any of the following conditions: A) An occurrence of  $\geq 2$  ICD-10 codes G40 (epilepsy and status epilepticus, respectively) on separate dates; *or* B) An occurrence of  $\geq 1$  ICD-10 code R56 (convulsions not elsewhere classified) *and*  $\geq 1$  ICD-10 codes G40 on separate dates; diagnosis of R56 had to precede that of G40.<sup>16, 17</sup>

\*\* Maternal diseases, were identified from ICD-10 codes from the Medical Birth Register and from ICD-9 and ICD-10 codes from the National Patient Register.

<sup>†</sup> Definition of pre-gestational hypertension also included self-reported information at the first antenatal visit.

<sup>‡</sup> Neonatal diseases were identified from ICD-10 codes from the Medical Birth Register and the National Patient Register.

<sup>§§</sup> Information on infections was restricted to the first 28 days of life.

<sup>1</sup>ICD-10 codes of minor malformations are available at <http://www.socialstyrelsen.se/register/halsodataregister/medicinskafodelseregistret/Documents/diagnoser-som-inte-ska-rapporteras.pdf>

**eTable 2.** ICD-10 Codes For Major Congenital Malformations According to the European Surveillance of Congenital Anomalies Classification (EUROCAT; [www.eurocat-network.eu](http://www.eurocat-network.eu)) definition. Codes identified in the National Patient Register, and the Swedish Medical Birth Register.

| #  | Organ System                                                                | ICD-10 codes                                                                                                     | Comment                                               |
|----|-----------------------------------------------------------------------------|------------------------------------------------------------------------------------------------------------------|-------------------------------------------------------|
| 1  | Nervous System                                                              | Q00-Q07                                                                                                          |                                                       |
| 2  | Eye                                                                         | Q100, Q104, Q106-Q109, Q11-Q12, Q130-Q134, Q136-Q139, Q14-Q15                                                    |                                                       |
| 3  | Ear, Face and Neck                                                          | Q16, Q176-Q178, Q183, Q188                                                                                       |                                                       |
| 4  | Congenital Heart Defects                                                    | Q20-Q25, Q260, Q262-Q269                                                                                         |                                                       |
| 5  | Respiratory System                                                          | Q300, Q321-Q329, Q330, Q332-Q335, Q337-Q339, Q34                                                                 |                                                       |
| 6  | Orofacial Clefts                                                            | Q35-Q37                                                                                                          |                                                       |
| 7  | Digestive System                                                            | Q380, Q383-Q389, Q39, Q402-Q409, Q431-Q439, Q44-Q45, Q790                                                        | Q385A was not included                                |
| 8  | Abdominal Wall Defects                                                      | Q792-Q793, Q795                                                                                                  |                                                       |
| 9  | Urinary System                                                              | Q60, Q611-Q619, Q620-Q626, Q628-Q629, Q630-Q632, Q634-Q639, Q64, Q794                                            |                                                       |
| 10 | Genital Organs                                                              | Q50-Q51, Q520-Q522, Q524, Q526, Q528-Q529, Q54-Q56                                                               |                                                       |
| 11 | Limb                                                                        | Q660-Q661, Q679, Q681-Q682, Q686-Q689, Q70-Q74                                                                   |                                                       |
| 12 | Other                                                                       | Q750, Q77, Q780, Q782-Q788, Q80-Q81, Q820-Q824, Q826-Q829, Q860, Q890, Q893-Q894                                 |                                                       |
| X  | Teratogenic/genetic syndromes, microdeletions and chromosomal abnormalities | Q861-Q869, P350-P352, P371, Q619, Q751, Q754, Q771-Q772, Q780, Q796, Q85, Q87, D821, Q90-Q92, Q930-Q939, Q95-Q99 | All infants with any of these ICD codes were excluded |

**eTable 3. Clinical Characteristics of in Women With Epilepsy (n = 3412)**

| Characteristics                                      | Epilepsy mothers |
|------------------------------------------------------|------------------|
|                                                      | No. (%)          |
| <b>Type of epilepsy</b>                              |                  |
| Generalized                                          | 928 (27.2)       |
| Focal                                                | 1088 (31.9)      |
| Unidendified                                         | 1396 (40.9)      |
| <b>Antiepileptic drug treatment during pregnancy</b> |                  |
| Yes                                                  | 1363 (40.0)      |
| No                                                   | 2049 (60.0)      |
| <b>Type of therapy</b>                               |                  |
| Monotherapy                                          | 1138 (83.5)      |
| Polytherapy                                          | 181 (13.3)       |
| Unidendified                                         | 44 (3.2)         |
| <b>Antiepileptic drug treatment</b>                  |                  |
| Lamotrigine                                          | 628 (46.1)       |
| Oxcarbazepine                                        | 33 (2.4)         |
| Topiramate                                           | 55 (4.0)         |
| Levetiracetam                                        | 117 (8.6)        |
| Valproic acid                                        | 262 (19.2)       |
| Carbamazepine                                        | 418 (30.7)       |
| <b>Major malformation (Monotherapy only)</b>         |                  |
| Lamotrigine                                          | 22/503 (4.4)     |
| Oxcarbazepine                                        | 1/23 (4.4)       |
| Topiramate                                           | 3/24 (12.5)      |
| Levetiracetam                                        | 2/40 (5.0)       |
| Valproic acid                                        | 20/188 (10.6)    |
| Carbamazepine                                        | 22/360 (6.1)     |
